# Supplementary figures and images for: Homeostatic regulation through strengthening of neuronal network-correlated synaptic inputs
Source: eLife journal article supplement (doi:10.7554/elife.81958), 2022-12-14

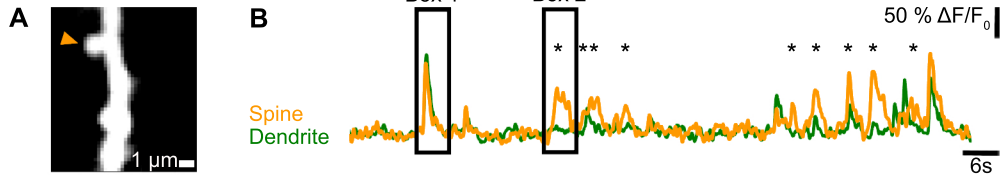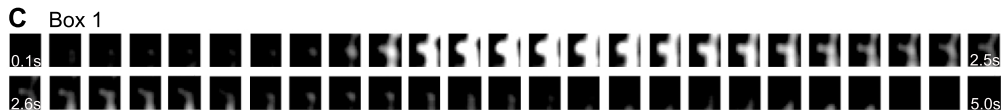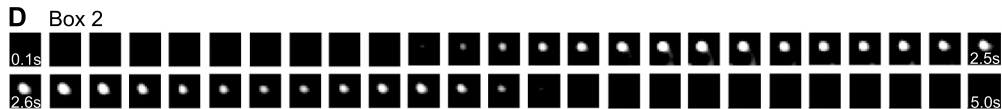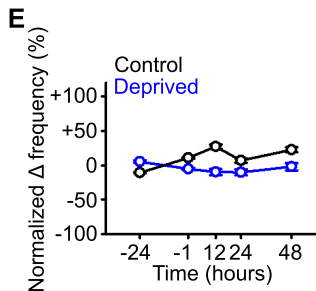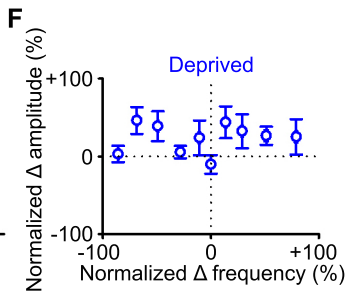

Supplement: supp [file elife-81958-supp-v1.zip]

**A**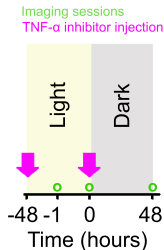**B**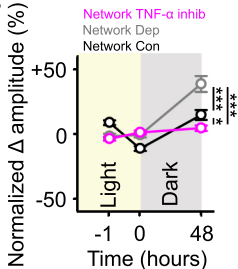**C**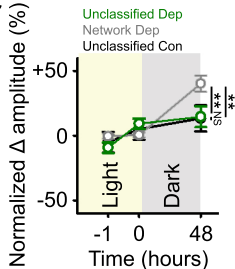**D**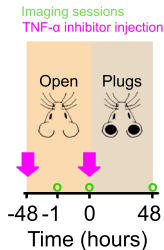**E**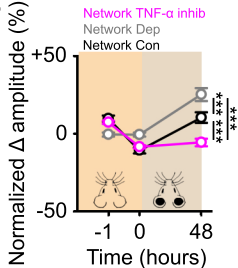**F**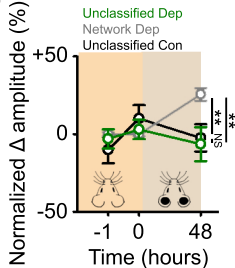

Supplement: supp [file elife-81958-supp-v1.zip]

**A**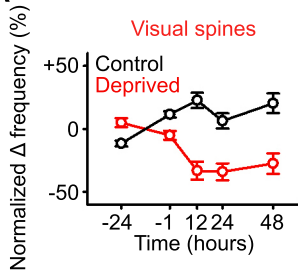**B**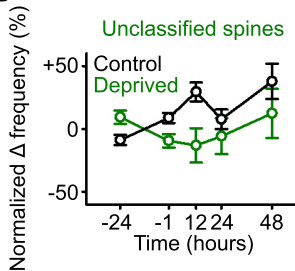**C**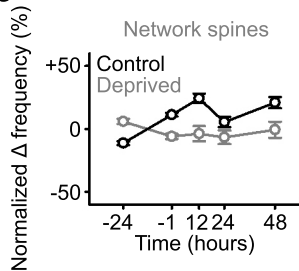**D**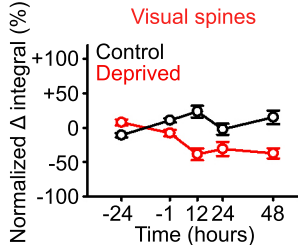**E**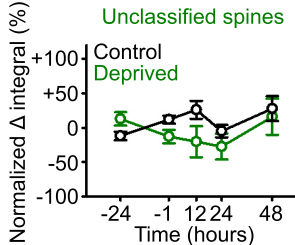**F**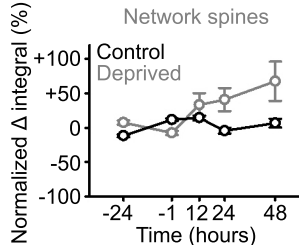

Supplement: supp [file elife-81958-supp-v1.zip]
